# Supplementary material
Source: HighWire-hosted journal article supplement (https://jnm.snmjournals.org/highwire/filestream/94805/field_highwire_adjunct_files/0/155853_Supplemental_Data.pdf)
Supplement: 155853_Supplemental_Data.pdf [file 155853_Supplemental_Data.pdf]

**Supplemental Table 1 data.** Toxicity according to NCI-CTC

| Patient No.<br>(follow-up in<br>months) | Activity <sup>a</sup><br>(treatment<br>cycles) | <sup>b</sup> Haematologic |     |     |     | Gastro-<br>intestinal <sup>c</sup> | Renal <sup>d</sup> | Allergic | Neuro            |
|-----------------------------------------|------------------------------------------------|---------------------------|-----|-----|-----|------------------------------------|--------------------|----------|------------------|
|                                         |                                                | WBC                       | Hb  | PLT | LC  |                                    |                    |          |                  |
| 1 (2)                                   | 1'688 (2)                                      | 0                         | 0   | 0   | nd  | 0                                  | 0                  | 0        | 0                |
| 2 (2)                                   | 4'500 (3)                                      | 0                         | 0   | 0   | 0   | 0                                  | 0                  | 0        | 0                |
| 3 (8)                                   | 8'438 (4)                                      | II                        | 0   | 0   | III | 0                                  | 0                  | 0        | 0                |
| 4 (36)                                  | 13'500 (2)                                     | 0                         | 0   | I   | 0   | 0                                  | 0                  | 0        | 0                |
| 5 (2)                                   | 14'800 (2)                                     | 0                         | 0   | 0   | 0   | 0                                  | 0                  | 0        | 0                |
| 6 (6)                                   | 12'580 (2)                                     | 0                         | 0   | I   | II  | 0                                  | 0                  | 0        | 0                |
| 7 (16)                                  | 12'950 (2)                                     | II                        | 0   | I   | III | 0                                  | 0                  | 0        | 0                |
| 8 (28)                                  | 13'320 (2)                                     | II                        | 0   | 0   | III | 0                                  | 0                  | 0        | 0                |
| 9 (3)                                   | 11'840 (2)                                     | 0                         | 0   | 0   | II  | 0                                  | 0                  | 0        | 0                |
| 10 (2)                                  | 13'320 (2)                                     | 0                         | 0   | 0   | 0   | 0                                  | 0                  | 0        | 0                |
| 11 (45)                                 | 14'800 (2)                                     | 0                         | 0   | 0   | III | 0                                  | 0                  | 0        | 0                |
| 12 (40)                                 | 13'690 (2)                                     | I                         | 0   | 0   | II  | 0                                  | 0                  | 0        | 0                |
| 13 (3)                                  | 11'250 (2)                                     | 0                         | 0   | 0   | 0   | 0                                  | 0                  | 0        | III <sup>f</sup> |
| 14 (14)                                 | 12'210 (2)                                     | 0                         | III | 0   | II  | 0                                  | II                 | 0        | 0                |
| 15 (3)                                  | 13'320 (2)                                     | 0                         | 0   | 0   | 0   | 0                                  | 0                  | 0        | II <sup>e</sup>  |

<sup>a</sup>Activity administered in MBq; number of treatment cycles

<sup>b</sup>WBC: white blood cells; LC: lymphocytes; Hb: hemoglobin; PLT: platelets; nd: not definable, lymphocytes recorded as percentage

<sup>c</sup>NV: Nausea/vomiting

<sup>d</sup>Creatinine

<sup>e</sup>Edema

<sup>f</sup>Transient self-limiting seizure
